# Supplementary figures and images for: Comparison of Conventional Imaging and 18F-Fluorodeoxyglucose Positron Emission Tomography/Computed Tomography in the Diagnostic Accuracy of Staging in Patients with Intrahepatic Cholangiocarcinoma
Source: MDPI journal article supplement (doi:10.3390/diagnostics12112889), 2022-11-21

## Supplementary Figure S1. Flow chart of patient selection.

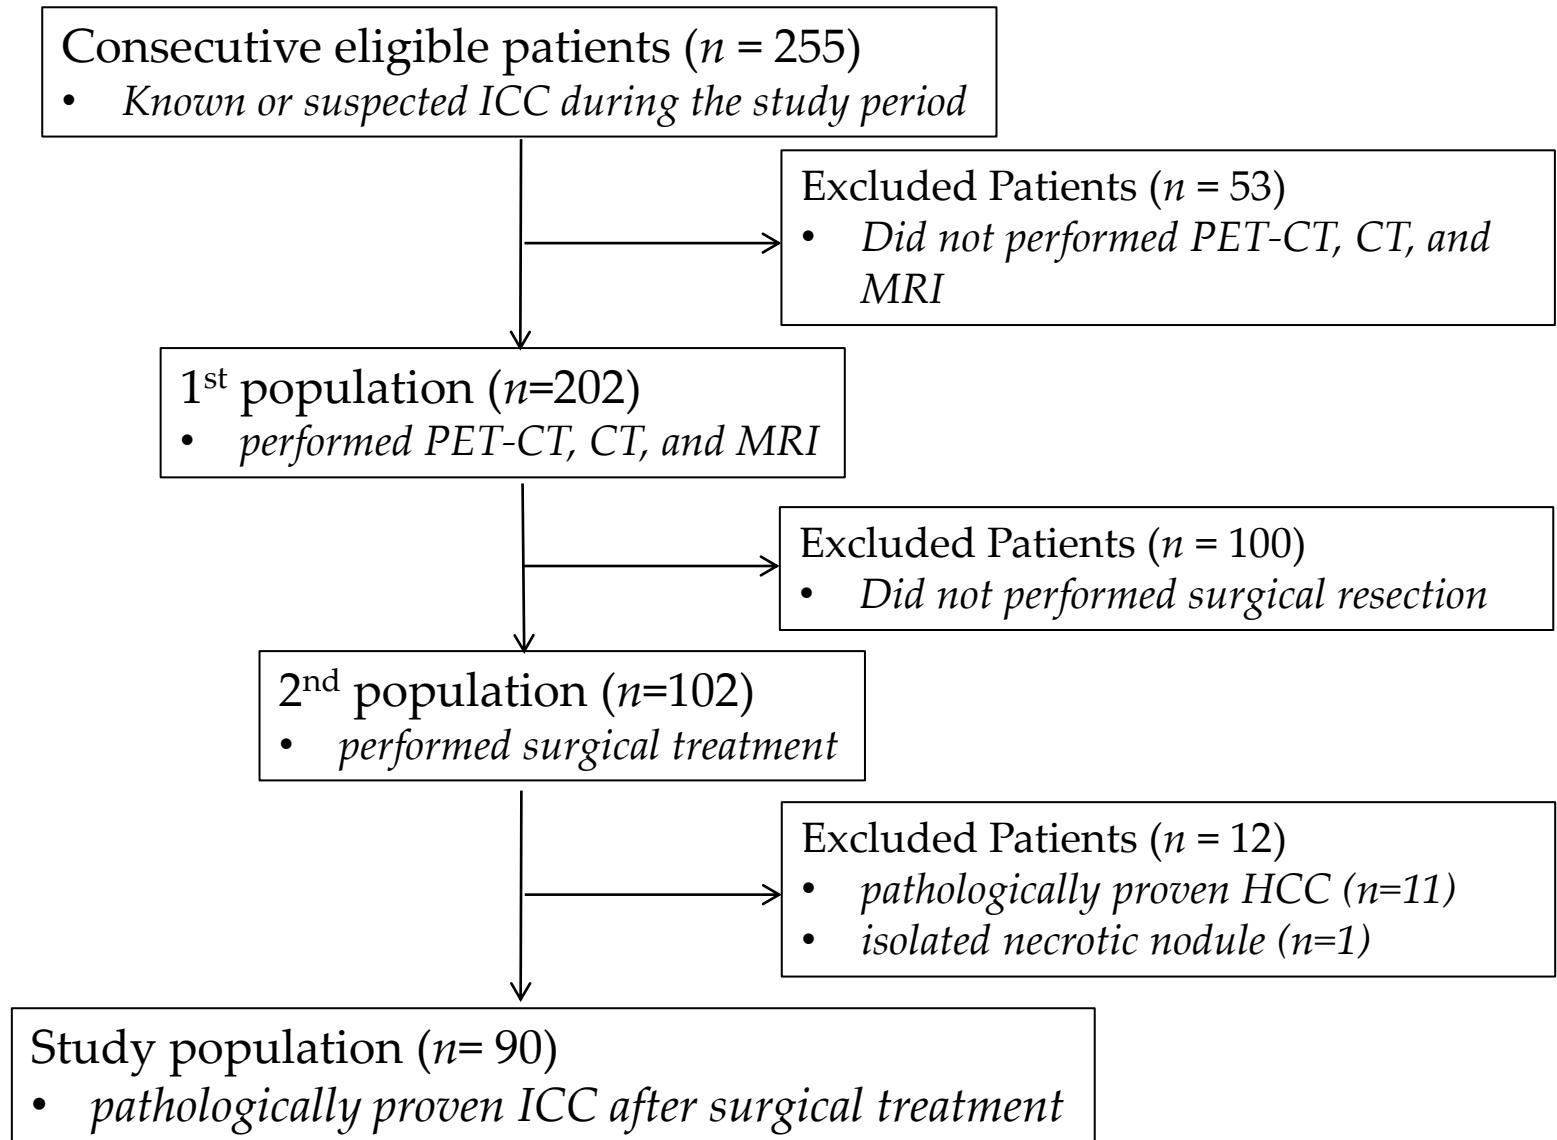

Supplement: s1 [file s1]
